# Supplementary material
Source: publisher site journal article supplement (https://static.cambridge.org/content/id/urn:cambridge.org:id:article:S0022109020000095/resource/name/S0022109020000095supp001.zip)
Supplement: Supplementary file 1 [file S0022109020000095supp001.zip]

**Supplementary Material for**  
**Do Firms Purposefully Change Capital Structure?**  
**Evidence from an Investment-Opportunity Shock to Drug Firms**

Erasmus Giambona, Joseph Golec, and Florencio Lopez-de-Silanes

**Supplementary Table A.1**  
**Market Leverage of Drug Firms after the BPCIA**

Table A.1 presents the coefficient estimates from OLS regressions. All firm level data are from the COMPUSTAT industrial database. Market leverage (MLEV) is the ratio of total debt to the market value of assets. The sample includes firms from the nondurable goods manufacturing segments (NAICS codes 3111--3262) over the periods 2007--2012 (column 1) and 2005--2007 and 2010--2012 (column 2). DRUG is a dummy variable that takes a value of 1 for firms in the NAICS group 3254 (Pharmaceutical and Medicine Manufacturing – Bureau of Labor Statistics – U.S. Department of Labor), and 0 otherwise. POST\_BPCIA is a dummy variable that takes a value of 1 for the years 2010--2012, and 0 otherwise. Control variables include  $q$ , TANG, LSIZE, RATING, RD, OPERCF, EVOL. Refer to the Appendix in the main paper for detailed variable definitions. Standard errors reported in parentheses are clustered at the NAICS-group level. \*\*\*, \*\* and \* indicate statistical significance at the 1%, 5%, and 10% (2-tail) test levels, respectively.

| Dependent variables:           | MLEV<br>1           | MLEV<br>2            |
|--------------------------------|---------------------|----------------------|
| DRUG × POST_BPCIA              | -0.027**<br>(0.011) | -0.026***<br>(0.008) |
| DRUG                           | Yes                 | Yes                  |
| POST_BPCIA                     | Yes                 | Yes                  |
| Control variables              | Yes                 | Yes                  |
| Control variables × POST_BPCIA | Yes                 | Yes                  |
| No. of obs.                    | 2,373               | 2,382                |
| $R^2$                          | 0.158               | 0.149                |

### Supplementary Table A.2

#### Debt Structure of Dug Firms without Biological Drugs and Biological Firms after the BPCIA

Table A.2 presents the coefficient estimates from OLS regressions. All firm level data are from the COMPUSTAT industrial database. The sample includes firms from the nondurable goods manufacturing segments (NAICS codes 3111--3262) over the period 2007--2012. Drug firms without biological drugs (NOBIO) are those in the NAICS group 3254 (excluding biological firms, NAICS code 325414). Biological firms (BIO) are those with NAICS code 325414. POST\_BPCIA is a dummy variable that takes a value of 1 for the years 2010--2012, and 0 otherwise. Control variables include  $q$ , TANG, LSIZE, RATING, RD, OPERCF, EVOL. Refer to the Appendix in the main paper for detailed variable definitions. Standard errors reported in parentheses are clustered at the NAICS-group level. \*\*\*, \*\*, and \* indicate statistical significance at the 1%, 5%, and 10% (2-tail) test levels, respectively.

| Dependent variables:                    | LEV<br>1             | UDEBT<br>2          | DEBT3<br>3          | DEBT5<br>4          | CDEBT<br>5           | CLEV<br>6            |
|-----------------------------------------|----------------------|---------------------|---------------------|---------------------|----------------------|----------------------|
| <hr/>                                   |                      |                     |                     |                     |                      |                      |
| <i>Panel A. Drug Without Biological</i> |                      |                     |                     |                     |                      |                      |
| NOBIO × POST_BPCIA                      | -0.019**<br>(0.008)  | 0.086***<br>(0.028) | 0.033**<br>(0.015)  | 0.021**<br>(0.010)  | -0.075***<br>(0.005) | -0.022***<br>(0.002) |
| NOBIO                                   | Yes                  | Yes                 | Yes                 | Yes                 | Yes                  | Yes                  |
| POST_BPCIA                              | Yes                  | Yes                 | Yes                 | Yes                 | Yes                  | Yes                  |
| Control variables                       | Yes                  | Yes                 | Yes                 | Yes                 | Yes                  | Yes                  |
| Control variables × POST_BPCIA          | Yes                  | Yes                 | Yes                 | Yes                 | Yes                  | Yes                  |
| No. of obs.                             | 2,211                | 1,807               | 1,766               | 1,766               | 1,970                | 2,210                |
| $R^2$                                   | 0.207                | 0.154               | 0.252               | 0.280               | 0.212                | 0.156                |
| <hr/>                                   |                      |                     |                     |                     |                      |                      |
| <i>Panel B. Biological</i>              |                      |                     |                     |                     |                      |                      |
| BIO × POST_BPCIA                        | -0.055***<br>(0.006) | 0.287***<br>(0.054) | 0.152***<br>(0.022) | 0.041***<br>(0.013) | -0.148***<br>(0.006) | -0.053***<br>(0.002) |
| BIO                                     | Yes                  | Yes                 | Yes                 | Yes                 | Yes                  | Yes                  |
| POST_BPCIA                              | Yes                  | Yes                 | Yes                 | Yes                 | Yes                  | Yes                  |
| Control variables                       | Yes                  | Yes                 | Yes                 | Yes                 | Yes                  | Yes                  |
| Control variables × POST_BPCIA          | Yes                  | Yes                 | Yes                 | Yes                 | Yes                  | Yes                  |
| No. of obs.                             | 1,947                | 1,639               | 1,605               | 1,580               | 1,782                | 1,946                |
| $R^2$                                   | 0.136                | 0.156               | 0.216               | 0.270               | 0.291                | 0.195                |

### Supplementary Table A.3

#### Debt Structure of Drug Firms after the BPCIA: Additional Controls for Financial Constraints

Table A.3 presents the coefficient estimates from OLS regressions. All firm level data are from the COMPUSTAT industrial database. The sample includes firms from the nondurable goods manufacturing segments (NAICS codes 3111--3262) over the period 2007--2012. DRUG is a dummy variable that takes a value of 1 for firms in the NAICS group 3254 (Pharmaceutical and Medicine Manufacturing – Bureau of Labor Statistics – U.S. Department of Labor), and 0 otherwise. POST\_BPCIA is a dummy variable that takes a value of 1 for the years 2010--2012, and 0 otherwise. Dividend Payer (DIVP) is an indicator for firms that pay dividends or repurchases their stocks. LAGE is the natural logarithm of the years since the firm's IPO date or since the firm's stock price is available in COMPUSTAT (if the IPO date is missing). Credit Ratings (CRATING) is a numerical variable ranging from 0 (unrated debt) to 23 (AAA debt). Control variables include  $q$ , TANG, LSIZE, RATING, RD, OPERCF, EVOL. Refer to the Appendix in the main paper for detailed variable definitions. Standard errors reported in parentheses are clustered at the NAICS-group level. \*\*\*, \*\*, and \* indicate statistical significance at the 1%, 5%, and 10% (2-tail) test levels, respectively.

| Dependent variables:                  | LEV<br>1             | UDEBT<br>2          | DEBT3<br>3         | DEBT5<br>4          | CDEBT<br>5           | CLEV<br>6            |
|---------------------------------------|----------------------|---------------------|--------------------|---------------------|----------------------|----------------------|
| DRUG × POST_BPCIA                     | -0.033***<br>(0.009) | 0.143***<br>(0.023) | 0.074**<br>(0.031) | 0.049**<br>(0.022)  | -0.072***<br>(0.012) | -0.026***<br>(0.002) |
| DRUG                                  | -0.052**<br>(0.022)  | 0.041***<br>(0.012) | 0.009<br>(0.024)   | -0.016<br>(0.018)   | 0.206***<br>(0.022)  | 0.052***<br>(0.005)  |
| POST_BPCIA                            | -0.077*<br>(0.035)   | 0.257**<br>(0.092)  | 0.086<br>(0.116)   | 0.061<br>(0.121)    | -0.084**<br>(0.033)  | -0.006<br>(0.007)    |
| <b>Financial constraints proxies:</b> |                      |                     |                    |                     |                      |                      |
| DIVP                                  | -0.064***<br>(0.016) | 0.010<br>(0.037)    | 0.007<br>(0.052)   | 0.019<br>(0.034)    | -0.045<br>(0.037)    | -0.019<br>(0.013)    |
| LAGE                                  | -0.023<br>(0.015)    | 0.085**<br>(0.032)  | 0.047*<br>(0.023)  | 0.023<br>(0.014)    | 0.025*<br>(0.014)    | 0.013*<br>(0.007)    |
| CRATING                               | 0.006**<br>(0.002)   | 0.006*<br>(0.003)   | -0.007*<br>(0.004) | -0.010**<br>(0.003) | -0.007<br>(0.005)    | -0.002<br>(0.001)    |
| DIVP × POST_BPCIA                     | 0.007<br>(0.026)     | 0.045<br>(0.030)    | 0.026<br>(0.054)   | 0.015<br>(0.042)    | 0.019<br>(0.024)     | 0.011<br>(0.009)     |
| LAGE × POST_BPCIA                     | -0.004<br>(0.009)    | -0.027<br>(0.020)   | -0.021<br>(0.020)  | -0.014<br>(0.015)   | -0.012<br>(0.008)    | -0.009<br>(0.005)    |
| CRATING × POST_BPCIA                  | -0.001<br>(0.001)    | 0.008***<br>(0.002) | 0.003<br>(0.005)   | -0.004<br>(0.003)   | -0.001<br>(0.001)    | 0.000<br>(<0.001)    |
| Control variables                     | Yes                  | Yes                 | Yes                | Yes                 | Yes                  | Yes                  |
| Control variables × POST_BPCIA        | Yes                  | Yes                 | Yes                | Yes                 | Yes                  | Yes                  |
| No. of obs.                           | 2,371                | 1,922               | 1,885              | 1,854               | 2,093                | 2,370                |
| $R^2$                                 | 0.157                | 0.193               | 0.219              | 0.271               | 0.262                | 0.173                |

**Supplementary Table A.4**

**Debt Structure of Drug Firms after the BPCIA: Using Alternative Proxies for Collateral and Asset Redeployability**

Table A.4 presents the coefficient estimates from OLS regressions. All firm level data are from the COMPUSTAT industrial database. The sample includes firms from the nondurable goods manufacturing segments (NAICS 3111--3262) over the period 2007--2012. DRUG is a dummy variable that takes a value of 1 for firms in the NAICS group 3254 (Pharmaceutical and Medicine Manufacturing – Bureau of Labor Statistics – U.S. Department of Labor), and 0 otherwise. POST\_BPCIA is a dummy variable that takes a value of 1 for the years 2010--2012, and 0 otherwise. Total Tangibility (TTANG) is the ratio of the sum of PP&E, receivables, inventory, and cash to assets (Berger, Ofek, and Swary, 1996). Value-Weighted Redeployability (VWR), Correlation-Adjusted Redeployability (CAR), and Equally-Weighted Redeployability (EWR) are three measures of collateral redeployability from Kim and Kung (2017). Control variables include  $q$ , TANG, LSIZE, RATING, RD, OPERCF, EVOL. Refer to The Appendix in the main paper for detailed variable definitions. Standard errors reported in parentheses are clustered at the NAICS-group level. \*\*\*, \*\*, and \* indicate statistical significance at the 1%, 5%, and 10% (2-tail) test levels, respectively.

| Dependent variables:              | LEV<br>1             | UDEBT<br>2          | DEBT3<br>3          | DEBT5<br>4         | CDEBT<br>5           | CLEV<br>6            |
|-----------------------------------|----------------------|---------------------|---------------------|--------------------|----------------------|----------------------|
| <i>Panel A. Total Tangibility</i> |                      |                     |                     |                    |                      |                      |
| DRUG × POST_BPCIA                 | -0.028***<br>(0.006) | 0.153***<br>(0.025) | 0.076***<br>(0.024) | 0.051**<br>(0.023) | -0.097***<br>(0.005) | -0.031***<br>(0.002) |
| DRUG                              | -0.047**<br>(0.021)  | 0.055**<br>(0.017)  | 0.013<br>(0.016)    | -0.023*<br>(0.012) | 0.225***<br>(0.008)  | 0.055***<br>(0.002)  |
| POST_BPCIA                        | -0.175***<br>(0.047) | 0.029<br>(0.074)    | -0.079<br>(0.085)   | -0.008<br>(0.085)  | -0.146**<br>(0.060)  | -0.052**<br>(0.023)  |
| TTANG                             | -0.298**<br>(0.103)  | 0.092<br>(0.056)    | 0.084<br>(0.170)    | -0.081<br>(0.148)  | 0.012<br>(0.046)     | -0.018<br>(0.014)    |
| TTANG × POST_BPCIA                | 0.157***<br>(0.039)  | 0.152*<br>(0.077)   | 0.121<br>(0.097)    | -0.004<br>(0.125)  | 0.112*<br>(0.056)    | 0.048**<br>(0.020)   |
| Control variables                 | Yes                  | Yes                 | Yes                 | Yes                | Yes                  | Yes                  |
| Control variables × POST_BPCIA    | Yes                  | Yes                 | Yes                 | Yes                | Yes                  | Yes                  |
| No. of obs.                       | 2,336                | 1,917               | 1,880               | 1,851              | 2,088                | 2,365                |
| $R^2$                             | 0.108                | 0.134               | 0.218               | 0.285              | 0.243                | 0.157                |

Supplementary Table A.4 (continued)

| Dependent variables:                             | LEV<br>1             | UDEBT<br>2          | DEBT3<br>3          | DEBT5<br>4         | CDEBT<br>5           | CLEV<br>6            |
|--------------------------------------------------|----------------------|---------------------|---------------------|--------------------|----------------------|----------------------|
| <i>Panel B. Value-Weight Redeployability</i>     |                      |                     |                     |                    |                      |                      |
| DRUG × POST_BPCIA                                | -0.040***<br>(0.007) | 0.160***<br>(0.025) | 0.071***<br>(0.021) | 0.040**<br>(0.018) | -0.086***<br>(0.004) | -0.030***<br>(0.001) |
| DRUG                                             | -0.037<br>(0.026)    | 0.046**<br>(0.020)  | 0.013<br>(0.020)    | -0.027<br>(0.015)  | 0.223***<br>(0.009)  | 0.054***<br>(0.003)  |
| POST_BPCIA                                       | -0.145***<br>(0.045) | 0.065<br>(0.124)    | -0.116<br>(0.098)   | -0.142<br>(0.128)  | -0.059**<br>(0.023)  | -0.025***<br>(0.008) |
| VWR                                              | -0.416<br>(0.270)    | 0.273<br>(0.359)    | 0.003<br>(0.244)    | -0.091<br>(0.211)  | 0.056<br>(0.093)     | 0.014<br>(0.038)     |
| VWR × POST_BPCIA                                 | 0.193*<br>(0.096)    | 0.151<br>(0.245)    | 0.329<br>(0.230)    | 0.416<br>(0.267)   | -0.065<br>(0.082)    | 0.007<br>(0.024)     |
| Control variables                                | Yes                  | Yes                 | Yes                 | Yes                | Yes                  | Yes                  |
| Control variables × POST_BPCIA                   | Yes                  | Yes                 | Yes                 | Yes                | Yes                  | Yes                  |
| No. of obs.                                      | 2,369                | 1,920               | 1,882               | 1,853              | 2,091                | 2,368                |
| R <sup>2</sup>                                   | 0.100                | 0.136               | 0.215               | 0.287              | 0.234                | 0.154                |
| <i>Panel C. Correlation-Adj. Redeployability</i> |                      |                     |                     |                    |                      |                      |
| DRUG × POST_BPCIA                                | -0.044***<br>(0.008) | 0.163***<br>(0.027) | 0.074***<br>(0.022) | 0.042**<br>(0.019) | -0.086***<br>(0.005) | -0.029***<br>(0.001) |
| DRUG                                             | -0.034<br>(0.028)    | 0.044*<br>(0.021)   | 0.010<br>(0.021)    | -0.029<br>(0.017)  | 0.223***<br>(0.010)  | 0.054***<br>(0.003)  |
| POST_BPCIA                                       | -0.157***<br>(0.043) | 0.104<br>(0.133)    | -0.068<br>(0.097)   | -0.121<br>(0.125)  | -0.054**<br>(0.024)  | -0.023**<br>(0.008)  |
| CAR                                              | -0.817<br>(0.521)    | 0.495<br>(0.700)    | 0.137<br>(0.468)    | -0.009<br>(0.398)  | 0.091<br>(0.168)     | 0.018<br>(0.066)     |
| CAR × POST_BPCIA                                 | 0.465**<br>(0.203)   | 0.037<br>(0.546)    | 0.341<br>(0.386)    | 0.659<br>(0.470)   | -0.153<br>(0.177)    | 0.001<br>(0.055)     |
| Control variables                                | Yes                  | Yes                 | Yes                 | Yes                | Yes                  | Yes                  |
| Control variables × POST_BPCIA                   | Yes                  | Yes                 | Yes                 | Yes                | Yes                  | Yes                  |
| No. of obs.                                      | 2,369                | 1,920               | 1,882               | 1,853              | 2,091                | 2,368                |
| R <sup>2</sup>                                   | 0.100                | 0.134               | 0.215               | 0.289              | 0.234                | 0.154                |

Supplementary Table A.4 (continued)

| Dependent variables:                           | LEV<br>1             | UDEBT<br>2          | DEBT3<br>3          | DEBT5<br>4         | CDEBT<br>5           | CLEV<br>6            |
|------------------------------------------------|----------------------|---------------------|---------------------|--------------------|----------------------|----------------------|
| <i>Panel D. Equally-Weight Redeployability</i> |                      |                     |                     |                    |                      |                      |
| DRUG × POST_BPCIA                              | -0.037***<br>(0.007) | 0.162***<br>(0.024) | 0.077***<br>(0.021) | 0.043**<br>(0.019) | -0.087***<br>(0.004) | -0.029***<br>(0.002) |
| DRUG                                           | -0.044*<br>(0.024)   | 0.049**<br>(0.020)  | 0.011<br>(0.018)    | -0.022<br>(0.013)  | 0.224***<br>(0.008)  | 0.055***<br>(0.002)  |
| POST_BPCIA                                     | -0.158**<br>(0.053)  | 0.054<br>(0.132)    | -0.103<br>(0.109)   | -0.142<br>(0.127)  | -0.053*<br>(0.025)   | -0.025**<br>(0.008)  |
| EWR                                            | -0.552<br>(0.363)    | 0.456<br>(0.446)    | 0.115<br>(0.334)    | -0.078<br>(0.297)  | 0.075<br>(0.127)     | 0.020<br>(0.052)     |
| EWR × POST_BPCIA                               | 0.262*<br>(0.129)    | 0.194<br>(0.303)    | 0.319<br>(0.313)    | 0.441<br>(0.302)   | -0.094<br>(0.113)    | 0.006<br>(0.033)     |
| Control variables                              | Yes                  | Yes                 | Yes                 | Yes                | Yes                  | Yes                  |
| Control variables × POST_BPCIA                 | Yes                  | Yes                 | Yes                 | Yes                | Yes                  | Yes                  |
| No. of obs.                                    | 2,369                | 1,920               | 1,882               | 1,853              | 2,091                | 2,368                |
| $R^2$                                          | 0.101                | 0.137               | 0.215               | 0.287              | 0.234                | 0.154                |

### Supplementary Table A.5

#### Debt Structure of Drug Firms after the BPCIA: Using Altman's Z-score and Distance to-Default as Proxies for Financial Distress

Table A.5 presents the coefficient estimates from OLS regressions. All firm level data are from the COMPUSTAT industrial database. The sample includes firms from the nondurable goods manufacturing segments (NAICS codes 3111--3262) over the period 2007--2012. DRUG is a dummy variable that takes a value of 1 for firms in the NAICS group 3254 (Pharmaceutical and Medicine Manufacturing – Bureau of Labor Statistics – U.S. Department of Labor), and 0 otherwise. POST\_BPCIA is a dummy variable that takes a value of 1 for the years 2010--2012, and 0 otherwise. ZSCORE is Altman's Z-score (Altman (1968)). Distance-to-Default (DTD) is Merton's (1974) distance-to-default. Control variables include  $q$ , TANG, LSIZE, RATING, RD, OPERCF, EVOL. Refer to The Appendix in the main paper for detailed variable definitions. Standard errors reported in parentheses are clustered at the NAICS-group level. \*\*\*, \*\*, and \* indicate statistical significance at the 1%, 5%, and 10% (2-tail) test levels, respectively.

| Dependent variables:             | LEV<br>1             | UDEBT<br>2               | DEBT3<br>3         | DEBT5<br>4          | CDEBT<br>5              | CLEV<br>6                |
|----------------------------------|----------------------|--------------------------|--------------------|---------------------|-------------------------|--------------------------|
| <i>Panel A. Altman's Z-Score</i> |                      |                          |                    |                     |                         |                          |
| DRUG × POST_BPCIA                | -0.026**<br>(0.011)  | 0.146***<br>(0.026)      | 0.066**<br>(0.022) | 0.037**<br>(0.016)  | -0.073***<br>(0.007)    | -0.031***<br>(0.003)     |
| DRUG                             | -0.025<br>(0.015)    | 0.022<br>(0.013)         | -0.012<br>(0.013)  | 0.037***<br>(0.011) | 0.208***<br>(0.017)     | 0.067***<br>(0.005)      |
| POST_BPCIA                       | -0.101**<br>(0.044)  | 0.119<br>(0.103)         | -0.022<br>(0.089)  | 0.012<br>(0.086)    | -0.109**<br>(0.038)     | -0.045**<br>(0.019)      |
| ZSCORE                           | -0.007***<br>(0.001) | 0.001***<br>( $<0.001$ ) | 0.004**<br>(0.001) | 0.001<br>(0.001)    | -0.003*<br>(0.001)      | -0.001*<br>(0.001)       |
| ZSCORE × POST_BPCIA              | 0.001<br>(0.001)     | -0.001<br>(0.001)        | -0.001<br>(0.001)  | -0.001<br>(0.001)   | 0.001**<br>( $<0.001$ ) | 0.001***<br>( $<0.001$ ) |
| Control variables                | Yes                  | Yes                      | Yes                | Yes                 | Yes                     | Yes                      |
| Control variables × POST_BPCIA   | Yes                  | Yes                      | Yes                | Yes                 | Yes                     | Yes                      |
| No. of obs.                      | 2,080                | 1,904                    | 1,866              | 1,836               | 2,075                   | 2,185                    |
| $R^2$                            | 0.304                | 0.155                    | 0.260              | 0.292               | 0.267                   | 0.275                    |

Supplementary Table A.5 (continued)

| Dependent variables:                | LEV<br>1             | UDEBT<br>2          | DEBT3<br>3          | DEBT5<br>4               | CDEBT<br>5           | CLEV<br>6            |
|-------------------------------------|----------------------|---------------------|---------------------|--------------------------|----------------------|----------------------|
| <i>Panel B. Distance-to-Default</i> |                      |                     |                     |                          |                      |                      |
| DRUG × POST_BPCIA                   | -0.036***<br>(0.009) | 0.146***<br>(0.029) | 0.076***<br>(0.023) | 0.042**<br>(0.018)       | -0.086***<br>(0.006) | -0.029***<br>(0.002) |
| DRUG                                | -0.030<br>(0.024)    | 0.036**<br>(0.016)  | -0.012<br>(0.018)   | -0.036**<br>(0.013)      | 0.213***<br>(0.018)  | 0.053***<br>(0.004)  |
| POST_BPCIA                          | -0.075<br>(0.045)    | 0.119<br>(0.100)    | 0.001<br>(0.079)    | 0.039<br>(0.074)         | -0.083**<br>(0.029)  | -0.021*<br>(0.010)   |
| DTD                                 | -0.009<br>(0.005)    | 0.022***<br>(0.007) | 0.010**<br>(0.004)  | -<br>0.012***<br>(0.003) | -0.011<br>(0.008)    | -0.004<br>(0.002)    |
| DTD × POST_BPCIA                    | -0.004<br>(0.003)    | 0.002<br>(0.006)    | 0.005<br>(0.003)    | 0.006<br>(0.004)         | 0.002<br>(0.003)     | 0.001<br>(0.001)     |
| Control variables                   | Yes                  | Yes                 | Yes                 | Yes                      | Yes                  | Yes                  |
| Control variables × POST_BPCIA      | Yes                  | Yes                 | Yes                 | Yes                      | Yes                  | Yes                  |
| No. of obs.                         | 2,340                | 1,910               | 1,857               | 1,819                    | 2,066                | 2,343                |
| $R^2$                               | 0.110                | 0.162               | 0.235               | 0.296                    | 0.254                | 0.163                |

**Supplementary Table A.6**

**Debt Structure of Drug Firms after the BPCIA: Controlling for Changes in Past Valuation and Performance**

Table A.6 presents the coefficient estimates from OLS regressions. All firm level data are from the COMPUSTAT industrial database. The sample includes firms from the nondurable goods manufacturing segments (NAICS codes 3111–3262) over the period 2007–2012. DRUG is a dummy variable that takes a value of 1 for firms in the NAICS group 3254 (Pharmaceutical and Medicine Manufacturing – Bureau of Labor Statistics – U.S. Department of Labor), and 0 otherwise. POST\_BPCIA is a dummy variable that takes a value of 1 for the years 2010–2012, and 0 otherwise. Control variables include  $q$ , TANG, LSIZE, RATING, RD, OPERCF, EVOL. Refer to The Appendix in the main paper for detailed variable definitions. Standard errors reported in parentheses are clustered at the NAICS-group level. \*\*\*, \*\*, and \* indicate statistical significance at the 1%, 5%, and 10% (2-tail) test levels, respectively.

| Dependent variables:                                                                                 |                      |                        |                                          |                                          |                          |                              |
|------------------------------------------------------------------------------------------------------|----------------------|------------------------|------------------------------------------|------------------------------------------|--------------------------|------------------------------|
|                                                                                                      | Leverage<br>1        | Unsecured<br>Debt<br>2 | Debt<br>Maturing<br>in ≤ 3<br>Years<br>3 | Debt<br>Maturing<br>in ≤ 5<br>Years<br>4 | Convertible<br>Debt<br>5 | Convertible<br>Leverage<br>6 |
| DRUG × POST_BPCIA                                                                                    | -0.055***<br>(0.007) | 0.139***<br>(0.029)    | 0.072***<br>(0.021)                      | 0.040**<br>(0.017)                       | -0.084***<br>(0.007)     | -0.031***<br>(0.002)         |
| DRUG                                                                                                 | -0.010<br>(0.024)    | 0.012<br>(0.015)       | -0.015<br>(0.019)                        | -0.026<br>(0.014)                        | 0.213***<br>(0.021)      | 0.057***<br>(0.004)          |
| POST_BPCIA                                                                                           | -0.087<br>(0.050)    | 0.145<br>(0.111)       | -0.017<br>(0.090)                        | -0.002<br>(0.080)                        | -0.104**<br>(0.039)      | -0.028*<br>(0.014)           |
| <b>Proxies for changes in past valuation &amp; performance (each variable is the lagged change):</b> |                      |                        |                                          |                                          |                          |                              |
| $Q$                                                                                                  | -0.001<br>(0.005)    | -0.001<br>(0.007)      | -0.007<br>(0.005)                        | 0.008***<br>(0.002)                      | -0.011<br>(0.009)        | -0.002<br>(0.002)            |
| SIZE                                                                                                 | -0.089*<br>(0.046)   | -0.017<br>(0.038)      | -0.064**<br>(0.027)                      | -0.088**<br>(0.031)                      | 0.030<br>(0.019)         | -0.007*<br>(0.004)           |
| OPERCF                                                                                               | 0.121***<br>(0.029)  | 0.102**<br>(0.035)     | 0.064*<br>(0.032)                        | 0.041<br>(0.038)                         | -0.040**<br>(0.015)      | 0.009**<br>(0.004)           |
| $q \times \text{POST\_BPCIA}$                                                                        | -0.005<br>(0.003)    | -0.033<br>(0.019)      | -0.015<br>(0.016)                        | 0.009<br>(0.014)                         | 0.010<br>(0.007)         | 0.004**<br>(0.002)           |
| SIZE × POST_BPCIA                                                                                    | 0.029<br>(0.017)     | 0.048<br>(0.046)       | -0.032<br>(0.036)                        | 0.005<br>(0.038)                         | -0.048*<br>(0.025)       | -0.018*<br>(0.009)           |
| OPERCF × POST_BPCIA                                                                                  | -0.203***<br>(0.050) | -0.198<br>(0.145)      | 0.007<br>(0.035)                         | -0.030<br>(0.032)                        | 0.144<br>(0.019)         | -0.043***<br>(0.010)         |
| Control variables                                                                                    | Yes                  | Yes                    | Yes                                      | Yes                                      | Yes                      | Yes                          |
| Control variables × POST_BPCIA                                                                       | Yes                  | Yes                    | Yes                                      | Yes                                      | Yes                      | Yes                          |
| No. of obs.                                                                                          | 2,278                | 1,842                  | 1,819                                    | 1,782                                    | 2,012                    | 2,277                        |
| $R^2$                                                                                                | 0.113                | 0.157                  | 0.232                                    | 0.290                                    | 0.247                    | 0.162                        |
